# Supplementary material for: Endovascular Treatment for Acute Ischemic Stroke With or Without General Anesthesia: A Matched Comparison
Source: PubMed Central journal article supplement (PMC10082068; doi:10.1161/strokeaha.121.034934), 2022-03-28
Supplement: str-53-1520-s001.pdf [file str-53-1520-s001.pdf]

# Supplemental material

## **Supplemental tables:**

Table I: Patient baseline characteristics of the complete CEM-matched data set

Table II: Patient baseline characteristics of the complete PSM-matched data set

Table III: Distribution of the affected vascular territories, unmatched

Table IV: Distribution of the endovascular treatment modality and rates of intravenous bridging thrombolysis, unmatched

## **Supplemental figures:**

Figure I: Proportions of patients treated with and without GA from 2014 until 2017

Figure II: Distribution of modified Rankin Scale (mRS) 3 months after stroke by type of anaesthesia in the 6 largest participating centres, unmatched

Figure III: Distribution of modified Rankin Scale (mRS) 3 months after stroke by type of anaesthesia from 2014 to 2017, unmatched

**Supplemental tables:**

**Table I:** Patient baseline characteristics of the complete CEM-matched data set

|                                               | GA                 | non-GA              | <i>SMD</i>   |
|-----------------------------------------------|--------------------|---------------------|--------------|
| n=269                                         | 152                | 117                 |              |
| Sex male, n (%)                               | 85 (55.9)          | 71 (60.7)           | <i>0.097</i> |
| Age, mean ( $\pm$ SD)                         | 74.5 (10.8)        | 73.3 (12.2)         | <i>0.107</i> |
| NIHSS at admission, median [IQR]              | 14 [8, 18]         | 13 [8, 18]          | <i>0.101</i> |
| Multiple affected vascular territories, n (%) | 1 (0.7)            | 1 (0.9)             | <i>0.023</i> |
| Time to admission in min, median [IQR]        | 94.0 [58.8, 175.5] | 106.0 [62.0, 210.0] | <i>0.005</i> |
| mRS pre-hospital, n (%)                       |                    |                     | <i>0.222</i> |
| 0-1                                           | 135 (88.8)         | 101 (86.3)          |              |
| >1                                            | 17 (11.2)          | 16 (13.7)           |              |

\* CEM, Coarsened exact matching; GA, General anaesthesia; SD, standardised difference; SMD, standardised mean difference

**Table II:** Patient baseline characteristics of the complete PSM-matched data set

|                                               | GA                | non-GA              | <i>SMD</i>   |
|-----------------------------------------------|-------------------|---------------------|--------------|
| n=568                                         | 284               | 284                 |              |
| Sex male, n (%)                               | 160 (56.3)        | 147 (51.8)          | <i>0.092</i> |
| Age, mean ( $\pm$ SD)                         | 70.8 (14.4)       | 71.1 (14.0)         | <i>0.025</i> |
| NIHSS at admission, median [IQR]              | 14 [8, 19]        | 13 [7, 18]          | <i>0.195</i> |
| Multiple affected vascular territories, n (%) | 44 (15.5)         | 37 (13)             | <i>0.071</i> |
| Time to admission in min, median [IQR]        | 140 [69.2, 277.5] | 136.5 [65.0, 262.8] | <i>0.063</i> |
| mRS pre-hospital, n (%)                       |                   |                     | <i>0.136</i> |
| 0-1                                           | 251 (84.8)        | 246 (86.6)          |              |
| > 1                                           | 43 (15.2)         | 38 (13.4)           |              |

\* PSM, Propensity score matching; GA, General anaesthesia; SD, standardised difference; SMD, standardised mean difference

**Table III:** Distribution of the affected vascular territories, unmatched

|            | GA         | non-GA     | <i>SMD</i>   |
|------------|------------|------------|--------------|
| n=1284     | 851        | 433        |              |
| ACA, n (%) |            |            | <i>0.147</i> |
| bilateral  | 15 (1.8)   | 2 (0.5)    |              |
| left       | 39 (4.6)   | 16 (3.7)   |              |
| right      | 35 (4.1)   | 24 (5.5)   |              |
| no         | 762 (89.5) | 391 (90.3) |              |
| MCA, n (%) |            |            | <i>0.188</i> |
| bilateral  | 19 (2.2)   | 4 (0.9)    |              |
| left       | 410 (48.2) | 204 (47.1) |              |
| right      | 375 (44.1) | 213 (49.2) |              |
| no         | 47 (5.5)   | 12 (2.8)   |              |
| PCA, n (%) |            |            | <i>0.195</i> |
| bilateral  | 29 (3.4)   | 4 (0.9)    |              |
| left       | 25 (2.9)   | 7 (1.6)    |              |
| right      | 21 (2.5)   | 11 (2.5)   |              |
| no         | 776 (91.2) | 411 (94.9) |              |

\* GA, General anaesthesia; SMD, standardised mean difference; ACA, anterior cerebral artery; MCA, medial cerebral artery; PCA, posterior cerebral artery

**Table IV:** Distribution of the endovascular treatment modality and rates of intravenous bridging thrombolysis, unmatched

|                                       | GA         | non-GA     | <i>SMD</i>   |
|---------------------------------------|------------|------------|--------------|
| n=1284                                | 851        | 433        |              |
| type of intra-arterial therapy, n (%) |            |            |              |
| rtPA used                             | 30 (3.5)   | 21 (4.8)   | <i>0.065</i> |
| Urokinase used                        | 32 (3.8)   | 49 (11.3)  | <i>0.288</i> |
| mechanical treatment (including ‡)    | 776 (92.7) | 384 (89.1) | <i>0.126</i> |
| bridging IVT, n (%)                   | 519 (61.0) | 234 (54.0) | <i>0.141</i> |

\* Patients may have received more than one intra-arterial treatment modality.

† GA, General anaesthesia; SMD, standardised mean difference; IVT, intravenous thrombolysis

‡ mechanical treatment including stent retriever, aspiration, distal retriever; with or without balloon angioplasty, permanent intracranial stenting, extracranial stenting

**Supplemental figures:**

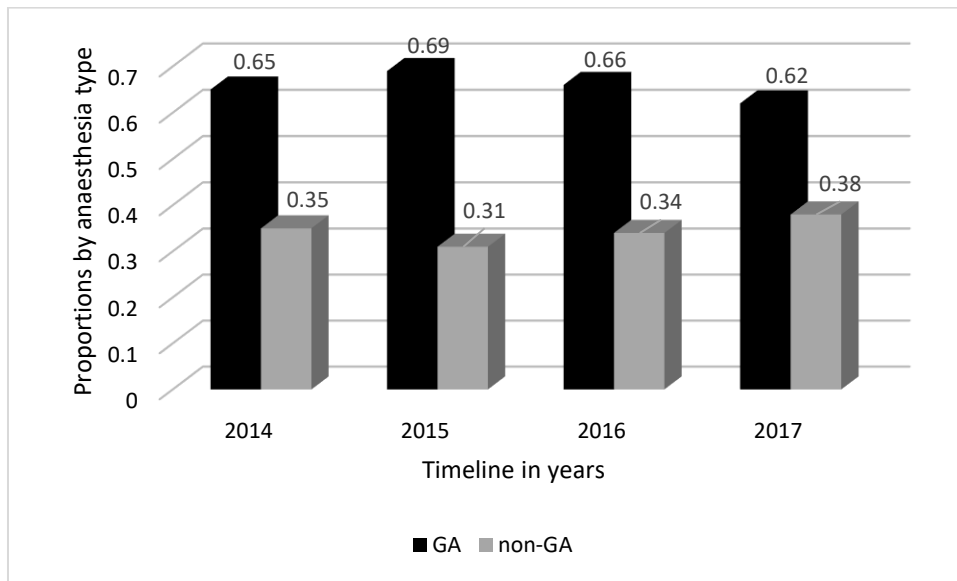

**Figure I:** Proportions of patients treated with and without GA from 2014 until 2017

\* GA, General anaesthesia

Data from Centre A (n = 373)

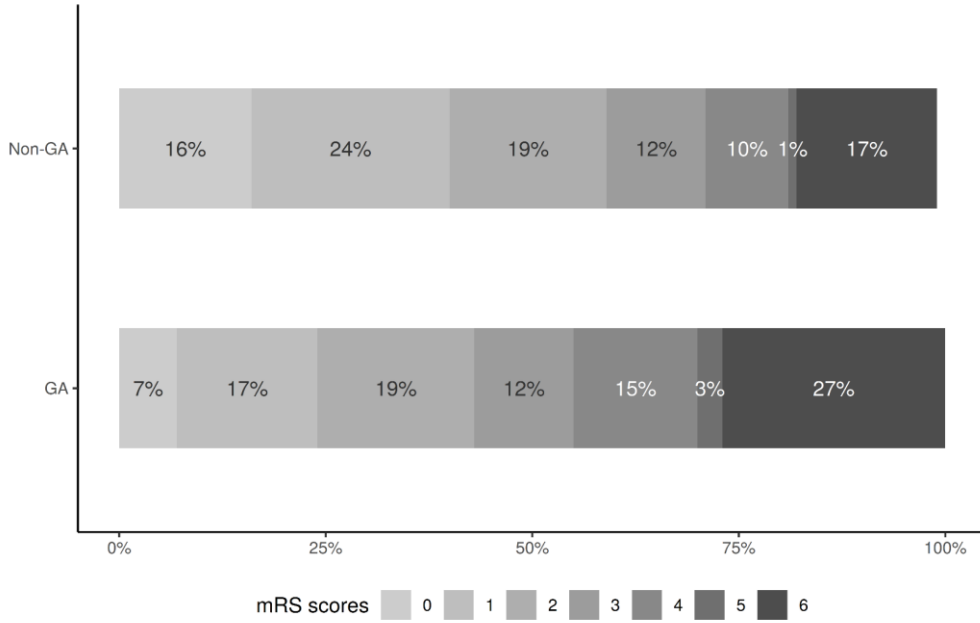

\* Non-GA: n = 139; GA: n = 234

Data from Centre B (n = 248)

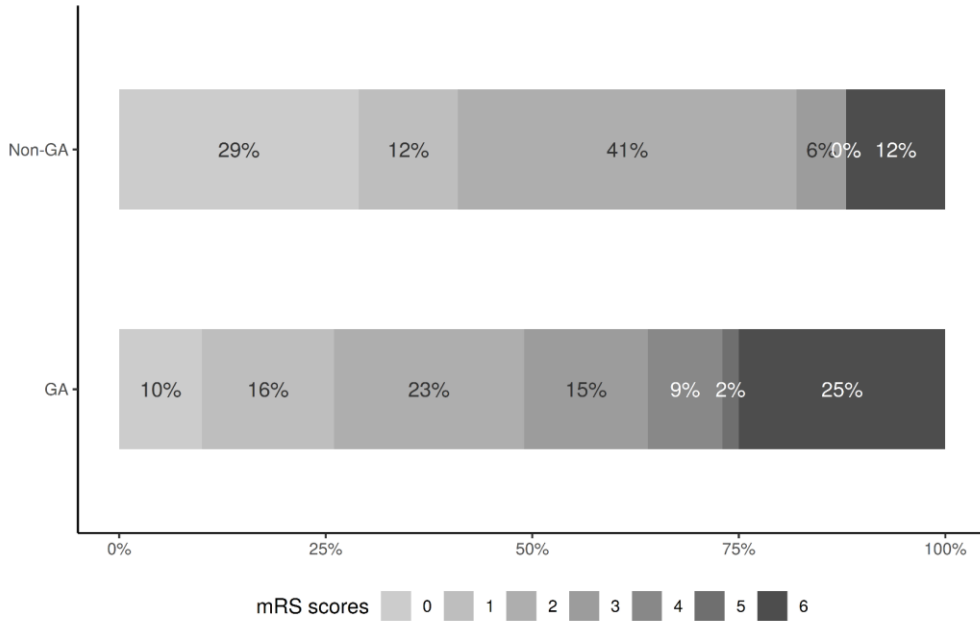

\* Non-GA: n = 17; GA: n = 231

Data from Centre C (n = 233)

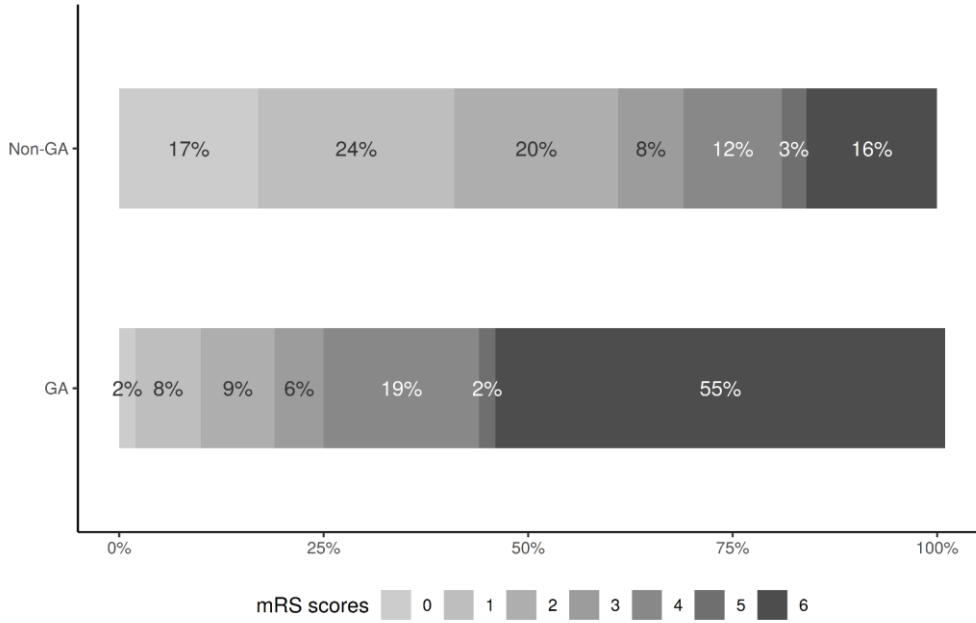

\* Non-GA: n = 180; GA: n = 53

Data from Centre D (n = 177)

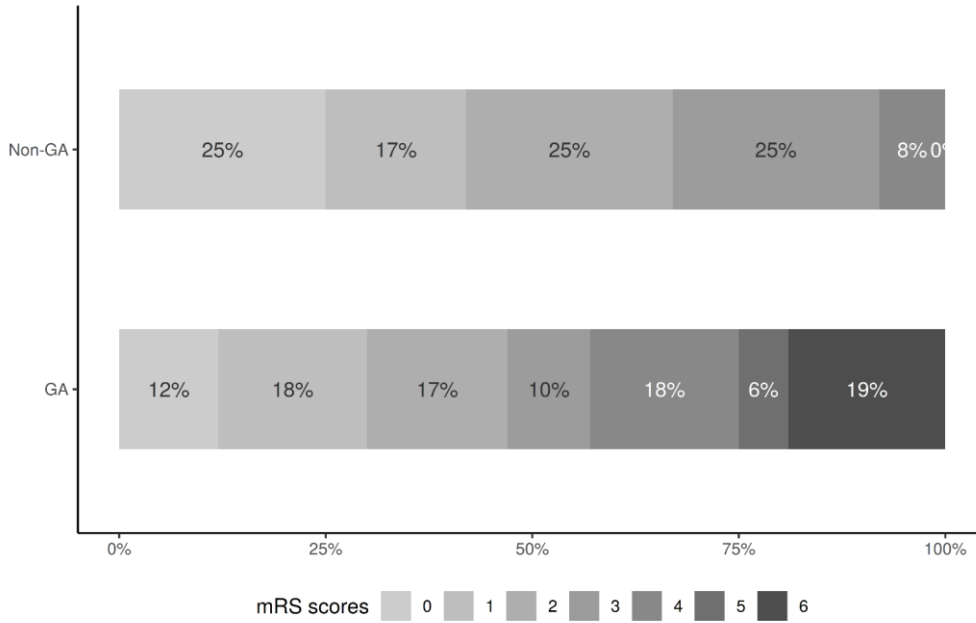

\* Non-GA: n = 12; GA: n = 165



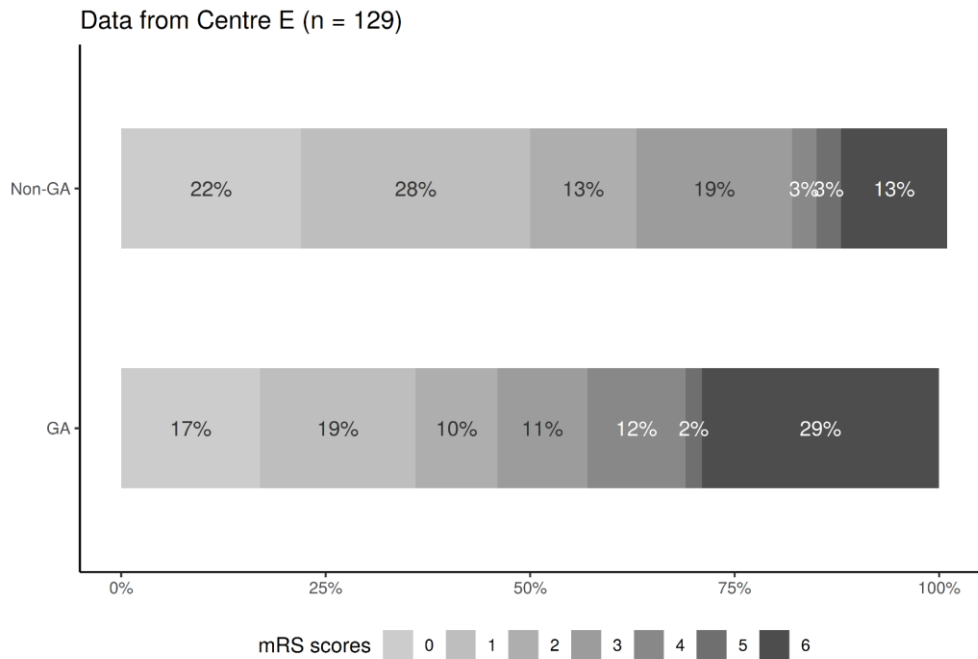

\* Non-GA: n = 32; GA: n = 97

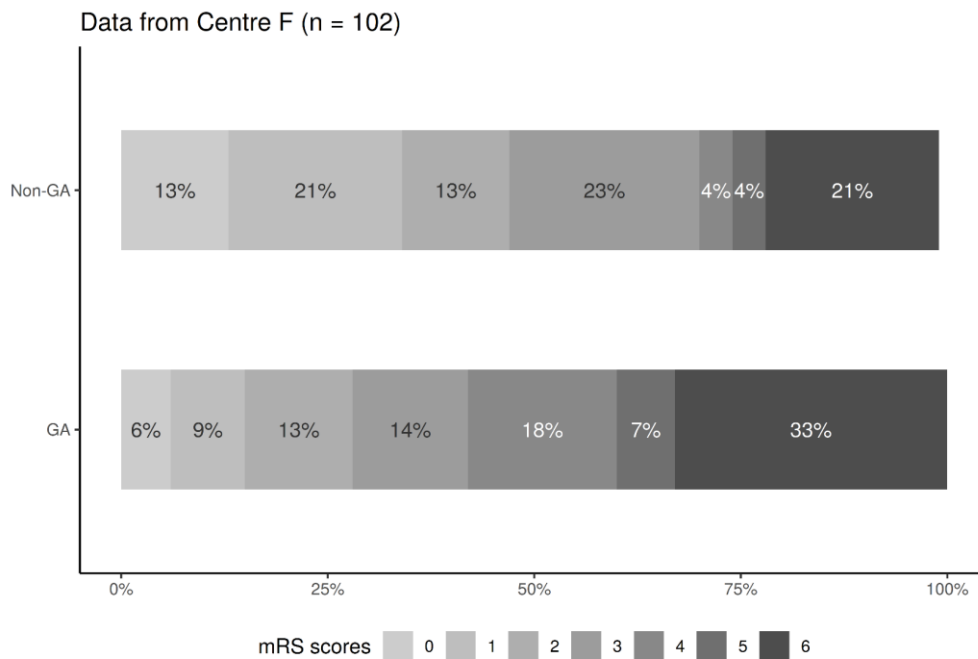

\* Non-GA: n = 47; GA: n = 55

**Figure II:** Distribution of modified Rankin Scale (mRS) 3 months after stroke by type of anaesthesia in the 6 largest participating centres, unmatched

\* GA, General anaesthesia

† mRS: 0= no symptoms, 1= no significant disability, 2= slight disability, 3= moderate disability, 4= moderately severe disability, 5= severe disability, 6= dead

Data from 2014 (n = 107)

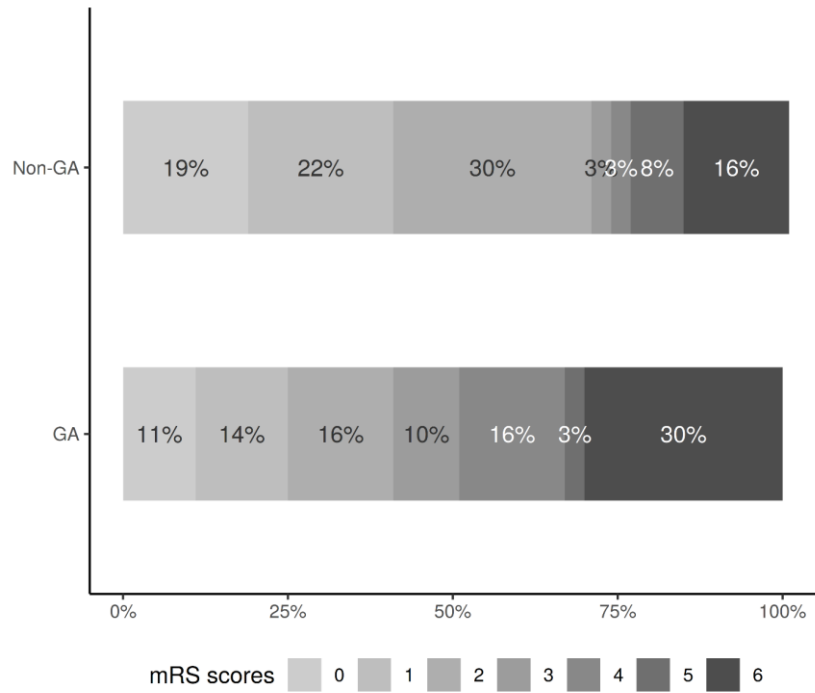

\* Non-GA: n = 37; GA: n = 70

Data from 2015 (n = 379)

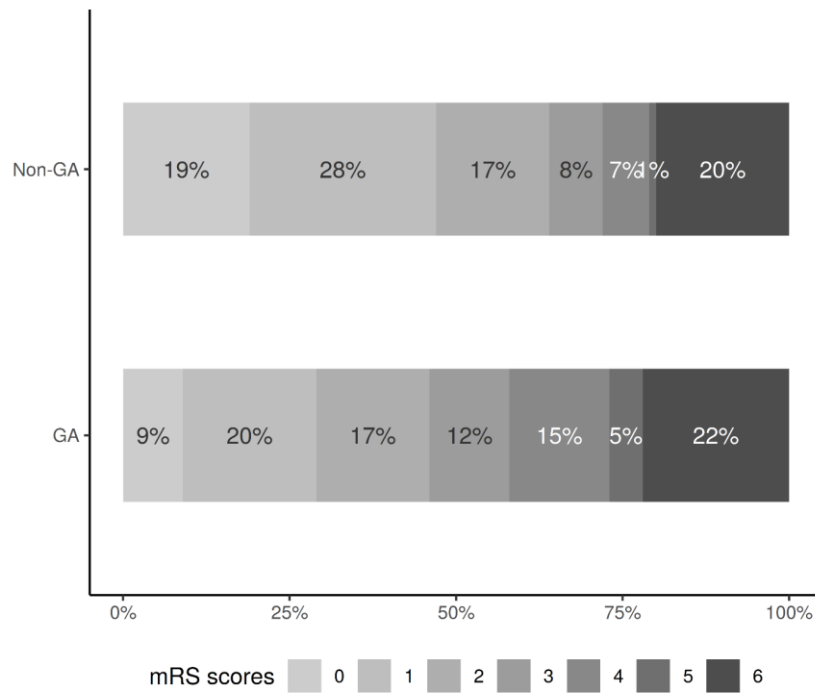

\* Non-GA: n = 116; GA: n = 263

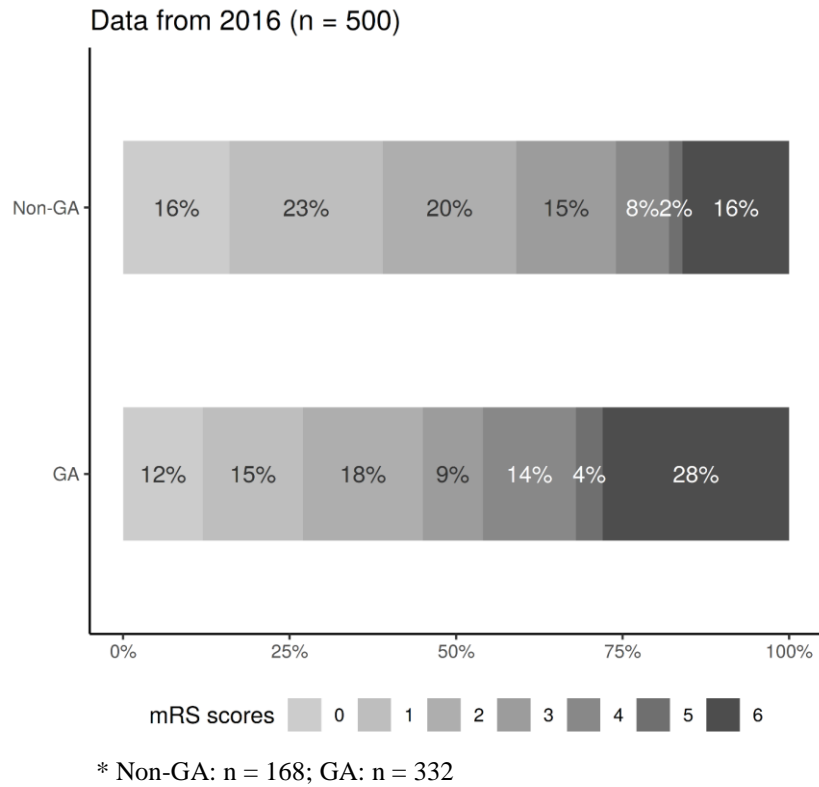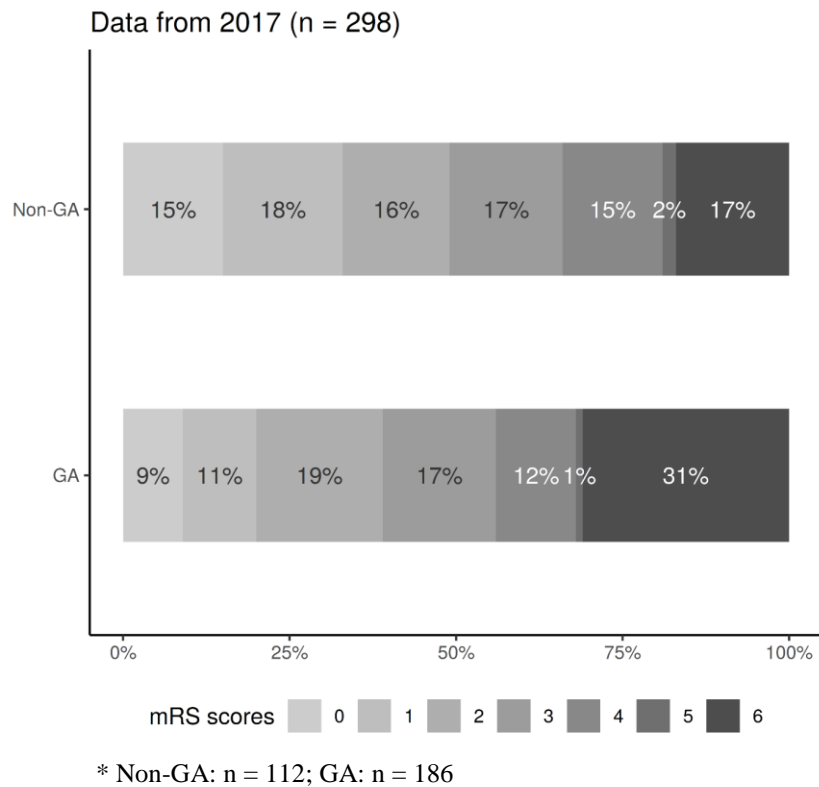

**Figure III:** Distribution of modified Rankin Scale (mRS) 3 months after stroke by type of anaesthesia from 2014 to 2017, unmatched

\* GA, General anaesthesia

† mRS: 0= no symptoms, 1= no significant disability, 2= slight disability, 3= moderate disability, 4= moderately severe disability, 5= severe disability, 6= dead
